# Supplementary material
Source: PubMed Central journal article supplement (PMC6123299)
Supplement: NIHMS948828-supplement-supplement_1.pdf [file NIHMS948828-supplement-supplement_1.pdf]

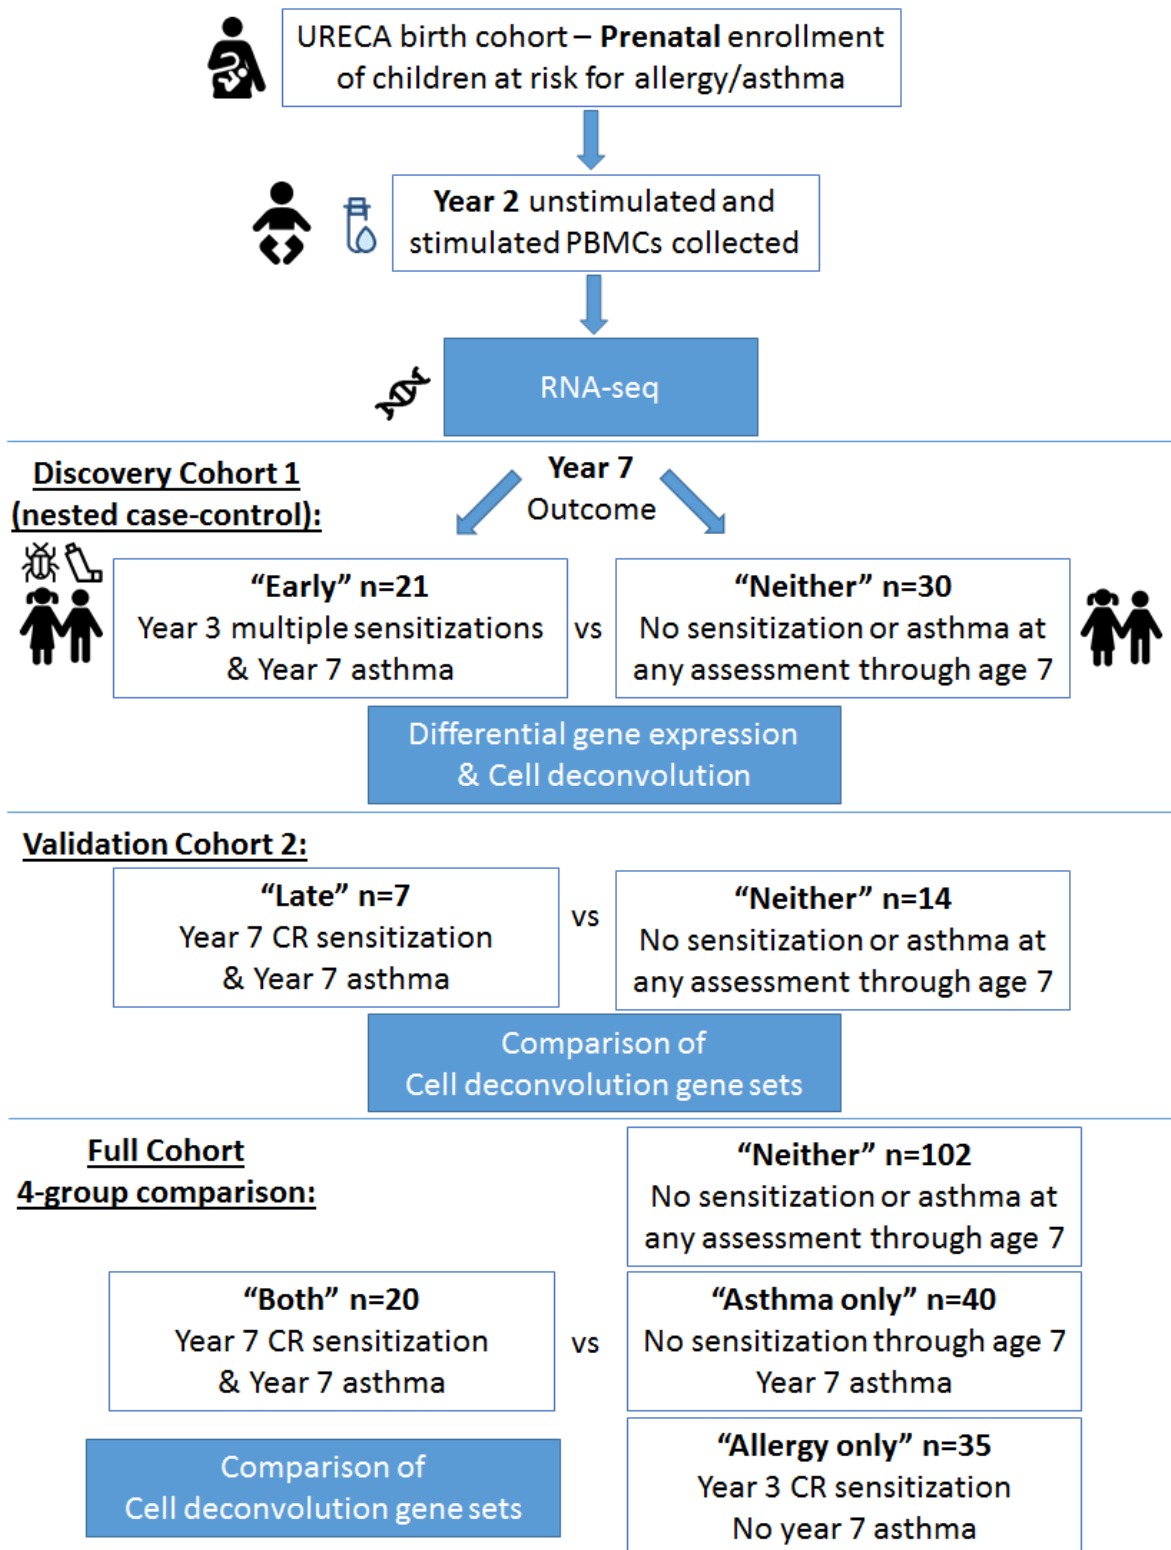

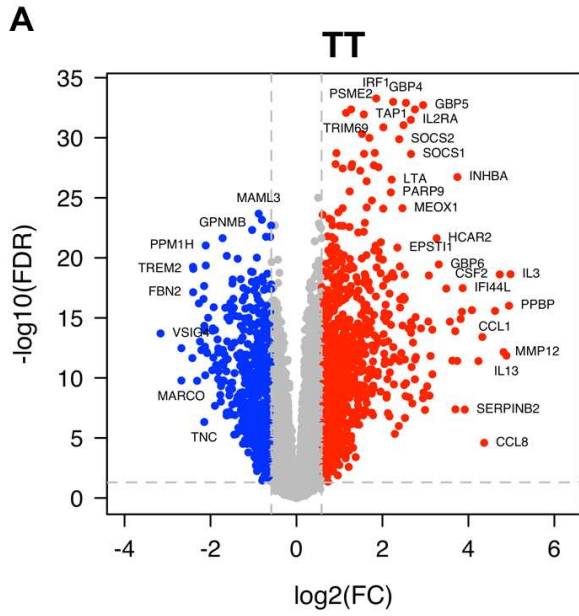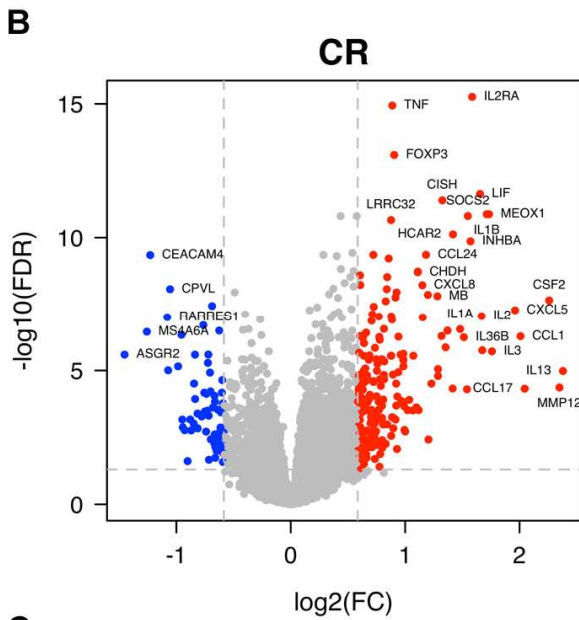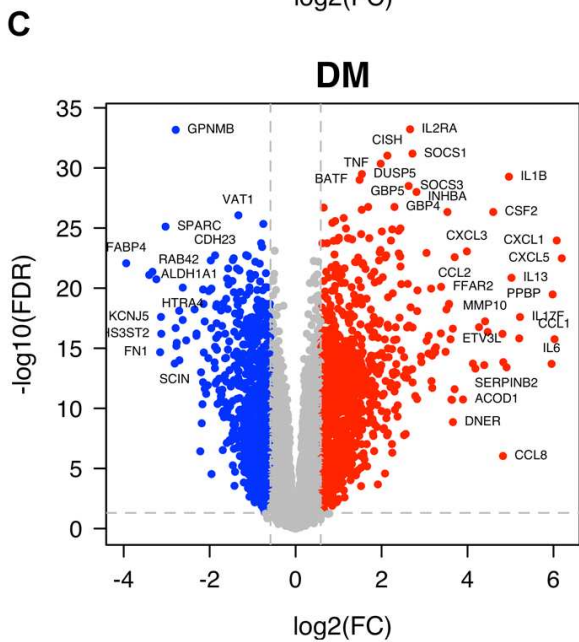



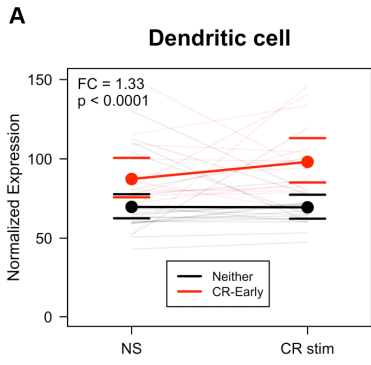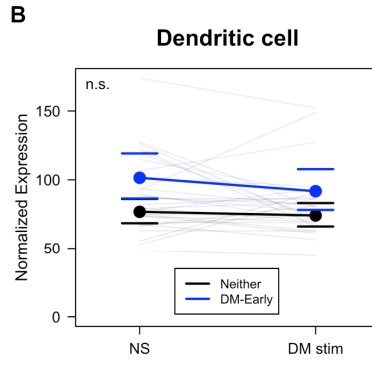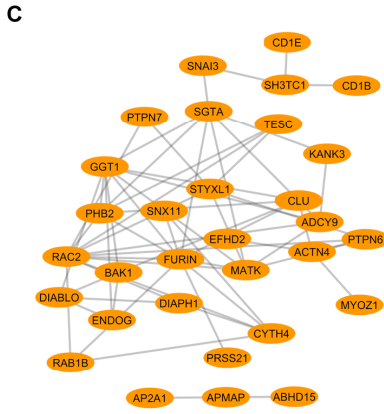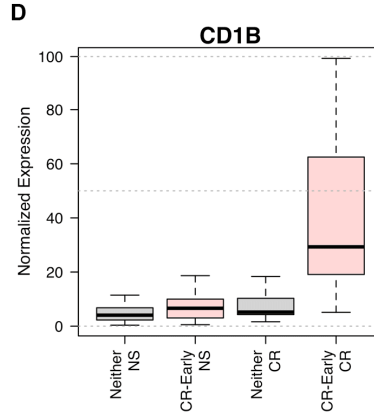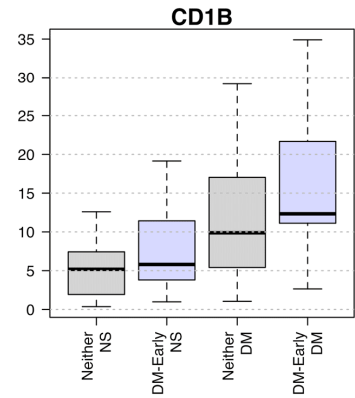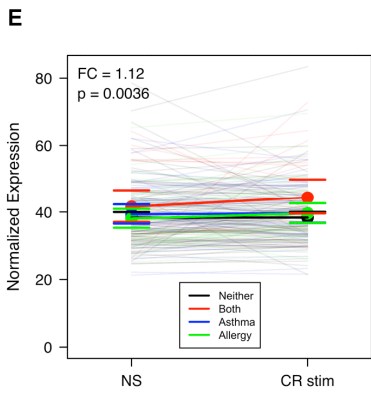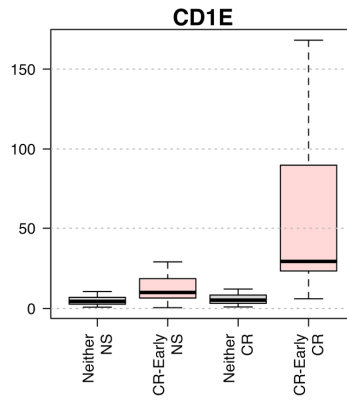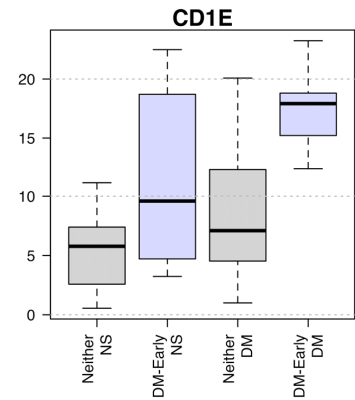

## Supplementary Materials

**Fig. S1. Overview of study design and analysis flow.** The schematic outlines the sample collection, sample selection and analyses conducted. URECA participants were enrolled prenatally. At age 2, PBMCs were collected and stimulated with allergen, antigen, and control medium. The current study was conducted after the children reached age 7. For the initial nested case-control cohort (cohort 1), RNA-sequencing was performed on the preserved year-2 PBMC RNA comparing “Early” cases (n=21) who developed  $\geq 2$  aeroallergen sensitizations by age 3 and a diagnosis of asthma at age 7 with “Neither” controls (n=30) who had no aeroallergen sensitization or asthma through age 7. Comparison was done by whole transcriptome differential gene expression followed by cell deconvolution of differentially expressed genes. To validate findings, cohort 2 included the remaining URECA participants who had  $\geq 1$  aeroallergen sensitization (including CR) by age 7 and a diagnosis of asthma at age 7, defined as “Late” (n=7), and compared to 14 additional “Neither” controls. A targeted analysis using the cell deconvolution assigned gene sets was performed. Finally all URECA participants with PBMC RNA samples collected at age 2 were compared in a 4 group comparison based on CR sensitization (age 3, yes/no) and asthma (age 7, yes/no). A targeted analysis using the cell deconvolution assigned was performed.

**Fig. S2. Allergen and antigen stimulations of PBMCs lead to robust gene expression changes.** (A) 7682 genes were differentially expressed comparing TT and NS samples in cohort 1. (B) 282 genes were differentially expressed comparing CR and NS samples in cohort 1. (C) 8009 genes were differentially expressed comparing DM and NS samples in cohort 1. (FDR<0.05)

and  $FC \geq 1.5$ ) (Stimulation linear modeling with fixed effects for site, gender, blood draw year, and stimulation and random effect for individual;  $n=51$ ).

**Fig. S3. Differentially expressed genes correlate with cell specific marker genes.** The 244 genes assigned to one of the 6 cell subsets showed high positive correlation with marker genes specific to the respective cell type (Pearson correlations, red = positive correlation, blue = negative correlation, yellow = no correlation).

**Fig. S4. Allergen stimulation of PBMCs cause increased DC gene expression.** (A) The DC gene set increases significantly with CR stimulation in the CR-Early group compared to Neither. (B) The DC gene set is not significantly different among the CR-Early, DM-Early, or Neither groups with DM stimulation. Number of individuals in each comparison is represented in parentheses; bounds represent 95% confidence intervals (Stimulation linear models with fixed effects for site, gender, blood draw year, home allergen levels, and stimulation; random effect for individual). (C) DC genes represent a connected network of known gene-gene interactions. (D) Boxplot of normalized expression of *CD1B* and *CD1E* showing group differences with allergen stimulation (Pink=CR-Early, Blue=DM-Early, Grey=Neither). (E) The NK cell gene set shows significantly higher baseline expression in all cases (Red; “Both” = Early and Late groups,  $n=20$ ) compared to Neither (Black,  $n=102$ ), asthma only (Blue; “Asthma”,  $n=40$ ), and CR allergy only (Green; “Allergy”,  $n=35$ ) groups and increases with CR stimulation only in the Both group.

**Table S1.** Shown are the clinical and demographic characteristics of cohort 1.

**Table S2.** Shown are the 244 genes differentially expressed between cases and controls after CR and/or DM expression, including the fold change and FDR values and the cell type assignments.

**Table S3.** Shown are the cell specific marker genes derived from IRIS and used for SPEC cell type assignment.

**Table S4.** Shown are the clinical and demographic characteristics of the full cohort divided according to outcome at age 7. “Neither” are those who developed neither allergic sensitization nor asthma. “Both” are those from the CR-Early and Late groups combined into a single group, hence individuals who developed both CR sensitization and asthma. “Asthma only” are those who developed asthma without any allergic sensitization. “Allergy only” are those who developed CR sensitization without asthma.

| ensemblID | hgnc_symb  | Cell Type   | Direction | CR fold cha | CR false dis | DM fold ch | DM false discovery rate |
|-----------|------------|-------------|-----------|-------------|--------------|------------|-------------------------|
| ENSG0000  | (FAM110C   | Bcell       | Positive  | 2.689       | 0.022        | 2.405      | 0.110                   |
| ENSG0000  | (ARMCX2    | Bcell       | Negative  | 0.769       | 0.025        | 0.858      | 0.197                   |
| ENSG0000  | (ZNF860    | Bcell       | Negative  | 0.550       | 0.031        | 0.553      | 0.093                   |
| ENSG0000  | (CH507-9B2 | Bcell       | Negative  | 0.457       | 0.039        | 0.628      | 0.306                   |
| ENSG0000  | (FCRL2     | Bcell       | Negative  | 0.634       | 0.044        | 0.735      | 0.175                   |
| ENSG0000  | (PGM1      | Bcell       | Positive  | 1.235       | 0.200        | 1.478      | 0.027                   |
| ENSG0000  | (HLA-G     | Bcell       | Positive  | 1.986       | 0.138        | 2.457      | 0.031                   |
| ENSG0000  | (TPST2     | DendriticCt | Positive  | 1.327       | 0.002        | 1.306      | 0.024                   |
| ENSG0000  | (APMAP     | DendriticCt | Positive  | 1.305       | 0.002        | 1.317      | 0.007                   |
| ENSG0000  | (FURIN     | DendriticCt | Positive  | 1.487       | 0.004        | 1.393      | 0.036                   |
| ENSG0000  | (CD1E      | DendriticCt | Positive  | 3.855       | 0.006        | 1.899      | 0.232                   |
| ENSG0000  | (RAP1GAP2  | DendriticCt | Positive  | 1.423       | 0.008        | 1.341      | 0.088                   |
| ENSG0000  | (SLC27A3   | DendriticCt | Positive  | 1.806       | 0.013        | 1.304      | 0.255                   |
| ENSG0000  | (PRSS21    | DendriticCt | Positive  | 2.268       | 0.013        | 1.775      | 0.208                   |
| ENSG0000  | (ADGRE5    | DendriticCt | Positive  | 1.328       | 0.014        | 1.228      | 0.130                   |
| ENSG0000  | (GPR153    | DendriticCt | Positive  | 1.719       | 0.016        | 1.609      | 0.026                   |
| ENSG0000  | (EFHD2     | DendriticCt | Positive  | 1.396       | 0.020        | 1.304      | 0.110                   |
| ENSG0000  | (CLU       | DendriticCt | Positive  | 1.917       | 0.020        | 1.979      | 0.068                   |
| ENSG0000  | (SPN       | DendriticCt | Positive  | 1.284       | 0.021        | 1.255      | 0.067                   |
| ENSG0000  | (RAB1B     | DendriticCt | Positive  | 1.251       | 0.021        | 1.224      | 0.128                   |
| ENSG0000  | (VPS16     | DendriticCt | Positive  | 1.194       | 0.021        | 1.130      | 0.190                   |
| ENSG0000  | (ADCY9     | DendriticCt | Positive  | 1.301       | 0.027        | 1.254      | 0.081                   |
| ENSG0000  | (LILRA6    | DendriticCt | Negative  | 0.561       | 0.030        | 0.582      | 0.053                   |
| ENSG0000  | (SGTA      | DendriticCt | Positive  | 1.302       | 0.030        | 1.241      | 0.152                   |
| ENSG0000  | (PTPN7     | DendriticCt | Positive  | 1.309       | 0.032        | 1.316      | 0.030                   |
| ENSG0000  | (BAK1      | DendriticCt | Positive  | 1.319       | 0.033        | 1.307      | 0.067                   |
| ENSG0000  | (GGT1      | DendriticCt | Positive  | 1.394       | 0.035        | 1.179      | 0.324                   |
| ENSG0000  | (SNX11     | DendriticCt | Positive  | 1.228       | 0.035        | 1.245      | 0.054                   |
| ENSG0000  | (AP2A1     | DendriticCt | Positive  | 1.216       | 0.035        | 1.166      | 0.180                   |
| ENSG0000  | (MATK      | DendriticCt | Positive  | 1.597       | 0.035        | 1.353      | 0.232                   |
| ENSG0000  | (TMEM184F  | DendriticCt | Positive  | 1.221       | 0.036        | 1.123      | 0.299                   |
| ENSG0000  | (CD1B      | DendriticCt | Positive  | 3.270       | 0.036        | 1.427      | 0.478                   |
| ENSG0000  | (RAC2      | DendriticCt | Positive  | 1.251       | 0.037        | 1.202      | 0.112                   |
| ENSG0000  | (CYTH4     | DendriticCt | Positive  | 1.252       | 0.037        | 1.104      | 0.438                   |
| ENSG0000  | (STYXL1    | DendriticCt | Positive  | 1.318       | 0.037        | 1.220      | 0.145                   |
| ENSG0000  | (SLC25A25  | DendriticCt | Positive  | 1.281       | 0.040        | 1.228      | 0.138                   |
| ENSG0000  | (TRIM8     | DendriticCt | Positive  | 1.211       | 0.040        | 1.164      | 0.173                   |
| ENSG0000  | (MAPKAPK2  | DendriticCt | Positive  | 1.217       | 0.040        | 1.179      | 0.170                   |
| ENSG0000  | (SH3TC1    | DendriticCt | Positive  | 1.362       | 0.040        | 1.250      | 0.228                   |
| ENSG0000  | (PTPN6     | DendriticCt | Positive  | 1.270       | 0.042        | 1.207      | 0.152                   |
| ENSG0000  | (ABHD15    | DendriticCt | Positive  | 1.250       | 0.042        | 1.189      | 0.141                   |
| ENSG0000  | (CHMP1A    | DendriticCt | Positive  | 1.230       | 0.042        | 1.216      | 0.126                   |
| ENSG0000  | (DIABLO    | DendriticCt | Positive  | 1.283       | 0.045        | 1.266      | 0.067                   |
| ENSG0000  | (ENDOG     | DendriticCt | Positive  | 1.445       | 0.045        | 1.338      | 0.216                   |
| ENSG0000  | (SNAI3     | DendriticCt | Positive  | 1.471       | 0.045        | 1.447      | 0.086                   |
| ENSG0000  | (DIAPH1    | DendriticCt | Positive  | 1.186       | 0.045        | 1.163      | 0.118                   |
| ENSG0000  | (TMEM109   | DendriticCt | Positive  | 1.237       | 0.045        | 1.217      | 0.121                   |
| ENSG0000  | (TESC      | DendriticCt | Positive  | 1.708       | 0.049        | 1.719      | 0.080                   |
| ENSG0000  | (ACTN4     | DendriticCt | Positive  | 1.236       | 0.049        | 1.194      | 0.127                   |



|                 |           |               |          |       |       |       |       |
|-----------------|-----------|---------------|----------|-------|-------|-------|-------|
| ENSG00000108280 | PHB2      | DendriticCell | Positive | 1.210 | 0.050 | 1.223 | 0.074 |
| ENSG00000108281 | CASS4     | DendriticCell | Positive | 1.515 | 0.050 | 1.117 | 0.600 |
| ENSG00000108282 | KANK3     | DendriticCell | Positive | 1.420 | 0.171 | 1.782 | 0.013 |
| ENSG00000108283 | MYOZ1     | DendriticCell | Positive | 2.078 | 0.086 | 2.641 | 0.027 |
| ENSG00000108284 | SLC35D2   | DendriticCell | Positive | 1.172 | 0.181 | 1.338 | 0.027 |
| ENSG00000108285 | DHRX      | DendriticCell | Positive | 1.210 | 0.161 | 1.325 | 0.038 |
| ENSG00000108286 | SPIRE2    | DendriticCell | Positive | 1.546 | 0.069 | 1.695 | 0.046 |
| ENSG00000108287 | BORCS6    | DendriticCell | Positive | 1.254 | 0.081 | 1.332 | 0.047 |
| ENSG00000108288 | SDSL      | DendriticCell | Positive | 1.378 | 0.193 | 1.617 | 0.048 |
| ENSG00000108289 | KDM2B     | DendriticCell | Positive | 1.102 | 0.255 | 1.196 | 0.048 |
| ENSG00000108290 | CHST2     | Monocyte      | Positive | 1.402 | 0.010 | 1.249 | 0.232 |
| ENSG00000108291 | TNFRSF1B  | Monocyte      | Positive | 1.392 | 0.014 | 1.196 | 0.248 |
| ENSG00000108292 | AOC1      | Monocyte      | Positive | 2.427 | 0.021 | 2.286 | 0.068 |
| ENSG00000108293 | NEK4      | Monocyte      | Negative | 0.770 | 0.021 | 0.811 | 0.126 |
| ENSG00000108294 | CEBPD     | Monocyte      | Positive | 1.547 | 0.021 | 1.383 | 0.197 |
| ENSG00000108295 | FES       | Monocyte      | Positive | 1.530 | 0.021 | 1.451 | 0.125 |
| ENSG00000108296 | PADI2     | Monocyte      | Positive | 2.069 | 0.035 | 1.761 | 0.118 |
| ENSG00000108297 | GPR68     | Monocyte      | Positive | 1.518 | 0.040 | 1.259 | 0.310 |
| ENSG00000108298 | PREX1     | Monocyte      | Positive | 1.230 | 0.040 | 1.200 | 0.152 |
| ENSG00000108299 | NUDT13    | Monocyte      | Negative | 0.741 | 0.040 | 0.728 | 0.028 |
| ENSG00000108300 | RETN      | Monocyte      | Positive | 4.708 | 0.044 | 2.062 | 0.390 |
| ENSG00000108301 | PCCA      | Monocyte      | Negative | 0.722 | 0.047 | 0.831 | 0.280 |
| ENSG00000108302 | GAB3      | Monocyte      | Positive | 1.221 | 0.048 | 1.156 | 0.247 |
| ENSG00000108303 | KCTD3     | Monocyte      | Negative | 0.775 | 0.157 | 0.706 | 0.022 |
| ENSG00000108304 | SYT11     | Monocyte      | Positive | 1.235 | 0.100 | 1.320 | 0.027 |
| ENSG00000108305 | HIST1H2AC | Monocyte      | Negative | 0.879 | 0.232 | 0.764 | 0.042 |
| ENSG00000108306 | TRPA1     | Monocyte      | Negative | 0.641 | 0.251 | 0.353 | 0.042 |
| ENSG00000108307 | ADGRG5    | NKcell        | Positive | 2.451 | 0.000 | 2.044 | 0.005 |
| ENSG00000108308 | NCR1      | NKcell        | Positive | 2.305 | 0.000 | 2.117 | 0.007 |
| ENSG00000108309 | NKG7      | NKcell        | Positive | 2.477 | 0.000 | 2.414 | 0.005 |
| ENSG00000108310 | GZMB      | NKcell        | Positive | 2.876 | 0.000 | 2.293 | 0.004 |
| ENSG00000108311 | PRF1      | NKcell        | Positive | 2.299 | 0.000 | 2.194 | 0.018 |
| ENSG00000108312 | CCNJL     | NKcell        | Positive | 3.129 | 0.000 | 2.469 | 0.017 |
| ENSG00000108313 | CST7      | NKcell        | Positive | 1.966 | 0.001 | 1.898 | 0.011 |
| ENSG00000108314 | MLC1      | NKcell        | Positive | 2.512 | 0.001 | 2.305 | 0.010 |
| ENSG00000108315 | SH2D1B    | NKcell        | Positive | 2.411 | 0.001 | 2.115 | 0.022 |
| ENSG00000108316 | PRR5L     | NKcell        | Positive | 1.837 | 0.001 | 1.695 | 0.014 |
| ENSG00000108317 | EOMES     | NKcell        | Positive | 1.802 | 0.001 | 1.673 | 0.005 |
| ENSG00000108318 | IL2RB     | NKcell        | Positive | 1.811 | 0.001 | 1.698 | 0.005 |
| ENSG00000108319 | SH2D2A    | NKcell        | Positive | 1.766 | 0.001 | 1.640 | 0.017 |
| ENSG00000108320 | ITPRIPL1  | NKcell        | Positive | 1.533 | 0.002 | 1.566 | 0.001 |
| ENSG00000108321 | ADAM8     | NKcell        | Positive | 1.489 | 0.002 | 1.329 | 0.122 |
| ENSG00000108322 | PDZD4     | NKcell        | Positive | 2.323 | 0.002 | 2.546 | 0.012 |
| ENSG00000108323 | TBX21     | NKcell        | Positive | 1.709 | 0.002 | 1.721 | 0.025 |
| ENSG00000108324 | IL18RAP   | NKcell        | Positive | 2.372 | 0.002 | 1.865 | 0.072 |
| ENSG00000108325 | S1PR5     | NKcell        | Positive | 2.277 | 0.002 | 2.118 | 0.027 |
| ENSG00000108326 | TNFRSF18  | NKcell        | Positive | 1.555 | 0.003 | 1.419 | 0.099 |
| ENSG00000108327 | NLRP7     | NKcell        | Positive | 2.293 | 0.003 | 1.716 | 0.147 |
| ENSG00000108328 | FASLG     | NKcell        | Positive | 2.211 | 0.003 | 1.807 | 0.099 |
| ENSG00000108329 | IL12RB2   | NKcell        | Positive | 2.169 | 0.004 | 1.832 | 0.029 |

|                    |        |          |       |       |       |       |
|--------------------|--------|----------|-------|-------|-------|-------|
| ENSG0000( CLIC3    | NKcell | Positive | 2.080 | 0.004 | 1.662 | 0.174 |
| ENSG0000( GNLY     | NKcell | Positive | 2.000 | 0.004 | 1.816 | 0.080 |
| ENSG0000( CD244    | NKcell | Positive | 1.774 | 0.005 | 1.641 | 0.027 |
| ENSG0000( RUNX3    | NKcell | Positive | 1.419 | 0.006 | 1.438 | 0.013 |
| ENSG0000( MIDN     | NKcell | Positive | 1.369 | 0.006 | 1.199 | 0.199 |
| ENSG0000( MMP12    | NKcell | Positive | 8.751 | 0.008 | 0.622 | 0.431 |
| ENSG0000( TIGIT    | NKcell | Positive | 1.597 | 0.009 | 1.573 | 0.017 |
| ENSG0000( CCR4     | NKcell | Positive | 1.509 | 0.010 | 1.705 | 0.020 |
| ENSG0000( DLG5     | NKcell | Positive | 2.007 | 0.010 | 1.761 | 0.068 |
| ENSG0000( KLRF1    | NKcell | Positive | 2.205 | 0.010 | 1.893 | 0.098 |
| ENSG0000( KLRC1    | NKcell | Positive | 2.382 | 0.010 | 1.654 | 0.163 |
| ENSG0000( GZMA     | NKcell | Positive | 1.856 | 0.010 | 1.776 | 0.058 |
| ENSG0000( HIC1     | NKcell | Positive | 1.824 | 0.011 | 1.569 | 0.112 |
| ENSG0000( ADGRG1   | NKcell | Positive | 2.024 | 0.011 | 1.972 | 0.037 |
| ENSG0000( CLDND2   | NKcell | Positive | 1.845 | 0.014 | 1.787 | 0.048 |
| ENSG0000( HOPX     | NKcell | Positive | 1.707 | 0.014 | 1.443 | 0.159 |
| ENSG0000( GADD45B  | NKcell | Positive | 1.321 | 0.015 | 1.169 | 0.233 |
| ENSG0000( TAPBP    | NKcell | Positive | 1.291 | 0.015 | 1.214 | 0.152 |
| ENSG0000( IL13     | NKcell | Positive | 8.060 | 0.015 | 4.036 | 0.005 |
| ENSG0000( CYB561   | NKcell | Positive | 1.404 | 0.015 | 1.409 | 0.045 |
| ENSG0000( KIR3DX1  | NKcell | Positive | 2.853 | 0.017 | 2.099 | 0.055 |
| ENSG0000( COLGALT2 | NKcell | Positive | 2.371 | 0.017 | 1.878 | 0.143 |
| ENSG0000( F2R      | NKcell | Positive | 1.737 | 0.018 | 1.692 | 0.037 |
| ENSG0000( MCF2L2   | NKcell | Positive | 1.730 | 0.018 | 1.544 | 0.162 |
| ENSG0000( KIR2DL4  | NKcell | Positive | 2.445 | 0.018 | 2.865 | 0.005 |
| ENSG0000( MYOM2    | NKcell | Positive | 2.710 | 0.018 | 2.036 | 0.142 |
| ENSG0000( ZBTB16   | NKcell | Positive | 1.788 | 0.020 | 1.585 | 0.153 |
| ENSG0000( LIM2     | NKcell | Positive | 2.878 | 0.021 | 2.527 | 0.126 |
| ENSG0000( CHST12   | NKcell | Positive | 1.374 | 0.021 | 1.333 | 0.227 |
| ENSG0000( CD300A   | NKcell | Positive | 1.637 | 0.021 | 1.338 | 0.255 |
| ENSG0000( NMUR1    | NKcell | Positive | 2.352 | 0.021 | 2.277 | 0.110 |
| ENSG0000( MOB3A    | NKcell | Positive | 1.250 | 0.021 | 1.196 | 0.152 |
| ENSG0000( CCL5     | NKcell | Positive | 1.636 | 0.021 | 1.567 | 0.101 |
| ENSG0000( PTGDR    | NKcell | Positive | 1.900 | 0.021 | 1.860 | 0.041 |
| ENSG0000( SEC24C   | NKcell | Positive | 1.159 | 0.021 | 1.134 | 0.162 |
| ENSG0000( RNF115   | NKcell | Positive | 1.154 | 0.021 | 1.119 | 0.193 |
| ENSG0000( TOMM34   | NKcell | Positive | 1.263 | 0.022 | 1.226 | 0.085 |
| ENSG0000( KLRD1    | NKcell | Positive | 1.846 | 0.027 | 1.719 | 0.110 |
| ENSG0000( LGALS9B  | NKcell | Positive | 3.019 | 0.027 | 2.463 | 0.138 |
| ENSG0000( KRT1     | NKcell | Positive | 3.151 | 0.027 | 3.194 | 0.029 |
| ENSG0000( ELF4     | NKcell | Positive | 1.247 | 0.028 | 1.198 | 0.157 |
| ENSG0000( SALL4    | NKcell | Positive | 2.195 | 0.030 | 1.892 | 0.158 |
| ENSG0000( BCL3     | NKcell | Positive | 1.415 | 0.030 | 1.161 | 0.430 |
| ENSG0000( KIR3DL2  | NKcell | Positive | 2.355 | 0.030 | 2.588 | 0.020 |
| ENSG0000( C19orf84 | NKcell | Positive | 2.070 | 0.030 | 1.625 | 0.193 |
| ENSG0000( ABI3     | NKcell | Positive | 1.326 | 0.030 | 1.341 | 0.118 |
| ENSG0000( CXCR3    | NKcell | Positive | 1.559 | 0.030 | 1.659 | 0.035 |
| ENSG0000( CX3CR1   | NKcell | Positive | 2.012 | 0.031 | 1.802 | 0.130 |
| ENSG0000( ADRB2    | NKcell | Positive | 1.534 | 0.032 | 1.367 | 0.210 |
| ENSG0000( XCL2     | NKcell | Positive | 1.984 | 0.035 | 1.656 | 0.110 |

|                   |          |          |       |       |       |       |
|-------------------|----------|----------|-------|-------|-------|-------|
| ENSG0000(LINGO2   | NKcell   | Positive | 2.379 | 0.035 | 2.354 | 0.090 |
| ENSG0000(FSCN1    | NKcell   | Positive | 1.744 | 0.035 | 1.411 | 0.194 |
| ENSG0000(XCL1     | NKcell   | Positive | 2.016 | 0.036 | 1.929 | 0.017 |
| ENSG0000(KIR2DL1  | NKcell   | Positive | 3.123 | 0.036 | 2.758 | 0.025 |
| ENSG0000(CTSW     | NKcell   | Positive | 1.794 | 0.037 | 1.752 | 0.031 |
| ENSG0000(JAKMIP1  | NKcell   | Positive | 1.902 | 0.038 | 1.769 | 0.120 |
| ENSG0000(B3GNT7   | NKcell   | Positive | 1.609 | 0.039 | 1.360 | 0.215 |
| ENSG0000(SEMA5A   | NKcell   | Positive | 2.637 | 0.039 | 3.291 | 0.035 |
| ENSG0000(HEATR9   | NKcell   | Positive | 1.579 | 0.039 | 1.402 | 0.266 |
| ENSG0000(KIR3DL1  | NKcell   | Positive | 2.124 | 0.039 | 2.379 | 0.016 |
| ENSG0000(CCL17    | NKcell   | Positive | 6.290 | 0.040 | 3.201 | 0.081 |
| ENSG0000(C9orf172 | NKcell   | Positive | 1.480 | 0.040 | 1.317 | 0.238 |
| ENSG0000(FAT4     | NKcell   | Positive | 2.642 | 0.041 | 2.708 | 0.051 |
| ENSG0000(NBEAL2   | NKcell   | Positive | 1.242 | 0.042 | 1.167 | 0.243 |
| ENSG0000(ENPP1    | NKcell   | Positive | 2.989 | 0.044 | 2.543 | 0.012 |
| ENSG0000(PCDH1    | NKcell   | Positive | 1.945 | 0.044 | 1.983 | 0.098 |
| ENSG0000(APOL4    | NKcell   | Positive | 2.474 | 0.045 | 1.662 | 0.214 |
| ENSG0000(FUT7     | NKcell   | Positive | 1.571 | 0.045 | 1.772 | 0.031 |
| ENSG0000(IFITM2   | NKcell   | Positive | 1.335 | 0.045 | 1.209 | 0.308 |
| ENSG0000(JAG2     | NKcell   | Positive | 1.689 | 0.045 | 1.552 | 0.221 |
| ENSG0000(TBKBP1   | NKcell   | Positive | 1.423 | 0.045 | 1.185 | 0.428 |
| ENSG0000(EML2     | NKcell   | Positive | 1.170 | 0.045 | 1.103 | 0.291 |
| ENSG0000(SBNO2    | NKcell   | Positive | 1.325 | 0.048 | 1.196 | 0.284 |
| ENSG0000(TNFRSF4  | NKcell   | Positive | 1.527 | 0.048 | 1.448 | 0.109 |
| ENSG0000(OGFR     | NKcell   | Positive | 1.230 | 0.049 | 1.143 | 0.315 |
| ENSG0000(IL9      | NKcell   | Positive | 2.073 | 0.356 | 9.018 | 0.005 |
| ENSG0000(KIR2DL3  | NKcell   | Positive | 1.840 | 0.100 | 2.528 | 0.013 |
| ENSG0000(TMPRSS3  | NKcell   | Positive | 1.552 | 0.201 | 2.232 | 0.013 |
| ENSG0000(MEOX1    | NKcell   | Positive | 1.907 | 0.146 | 2.409 | 0.017 |
| ENSG0000(WNT11    | NKcell   | Positive | 2.219 | 0.120 | 2.937 | 0.026 |
| ENSG0000(B3GAT1   | NKcell   | Positive | 1.885 | 0.092 | 2.281 | 0.027 |
| ENSG0000(HOXC4    | NKcell   | Positive | 1.878 | 0.108 | 1.892 | 0.027 |
| ENSG0000(C11orf84 | NKcell   | Positive | 1.117 | 0.313 | 1.304 | 0.030 |
| ENSG0000(SLC2A1   | NKcell   | Positive | 1.217 | 0.230 | 1.433 | 0.036 |
| ENSG0000(HN1      | NKcell   | Positive | 1.204 | 0.064 | 1.244 | 0.036 |
| ENSG0000(CNTNAP2  | TcellCD4 | Negative | 0.269 | 0.008 | 0.361 | 0.098 |
| ENSG0000(NBPF19   | TcellCD4 | Negative | 0.703 | 0.014 | 0.680 | 0.007 |
| ENSG0000(RAD52    | TcellCD4 | Negative | 0.781 | 0.015 | 0.737 | 0.013 |
| ENSG0000(COA1     | TcellCD4 | Negative | 0.796 | 0.019 | 0.783 | 0.079 |
| ENSG0000(PBX3     | TcellCD4 | Negative | 0.779 | 0.020 | 0.855 | 0.221 |
| ENSG0000(KLRB1    | TcellCD4 | Positive | 1.802 | 0.021 | 1.744 | 0.068 |
| ENSG0000(ENTPD4   | TcellCD4 | Negative | 0.799 | 0.021 | 0.799 | 0.049 |
| ENSG0000(WDR19    | TcellCD4 | Negative | 0.682 | 0.021 | 0.759 | 0.142 |
| ENSG0000(MRPS25   | TcellCD4 | Negative | 0.841 | 0.024 | 0.847 | 0.122 |
| ENSG0000(PPM1L    | TcellCD4 | Negative | 0.693 | 0.030 | 0.837 | 0.253 |
| ENSG0000(PHOSPHO2 | TcellCD4 | Negative | 0.632 | 0.030 | 0.832 | 0.467 |
| ENSG0000(GNAL     | TcellCD4 | Positive | 1.385 | 0.031 | 1.309 | 0.152 |
| ENSG0000(MBP      | TcellCD4 | Positive | 1.166 | 0.032 | 1.142 | 0.084 |
| ENSG0000(C11orf85 | TcellCD4 | Negative | 0.319 | 0.034 | 0.386 | 0.062 |
| ENSG0000(NPIP2    | TcellCD4 | Negative | 0.315 | 0.036 | 0.320 | 0.053 |

|                   |          |          |       |       |       |       |
|-------------------|----------|----------|-------|-------|-------|-------|
| ENSG0000(NBPF9    | TcellCD4 | Negative | 0.718 | 0.041 | 0.743 | 0.027 |
| ENSG0000(ADAMTSL5 | TcellCD4 | Positive | 1.896 | 0.042 | 1.911 | 0.051 |
| ENSG0000(RBM45    | TcellCD4 | Negative | 0.745 | 0.044 | 0.855 | 0.340 |
| ENSG0000(USP44    | TcellCD4 | Negative | 0.622 | 0.045 | 0.673 | 0.152 |
| ENSG0000(AGBL3    | TcellCD4 | Negative | 0.673 | 0.049 | 0.698 | 0.131 |
| ENSG0000(DSC1     | TcellCD4 | Negative | 0.318 | 0.050 | 0.360 | 0.165 |
| ENSG0000(PIGL     | TcellCD4 | Negative | 0.790 | 0.073 | 0.704 | 0.005 |
| ENSG0000(NEB      | TcellCD4 | Negative | 0.598 | 0.051 | 0.605 | 0.042 |
| ENSG0000(RASSF6   | TcellCD4 | Negative | 0.754 | 0.343 | 0.480 | 0.048 |
| ENSG0000(OSBPL5   | TcellCD8 | Positive | 1.644 | 0.004 | 1.526 | 0.041 |
| ENSG0000(APC2     | TcellCD8 | Positive | 1.461 | 0.009 | 1.162 | 0.398 |
| ENSG0000(TSEN54   | TcellCD8 | Positive | 1.338 | 0.010 | 1.314 | 0.027 |
| ENSG0000(DGKQ     | TcellCD8 | Positive | 1.377 | 0.014 | 1.274 | 0.126 |
| ENSG0000(ABCA2    | TcellCD8 | Positive | 1.352 | 0.021 | 1.261 | 0.152 |
| ENSG0000(ARHGEF19 | TcellCD8 | Positive | 1.416 | 0.021 | 1.345 | 0.142 |
| ENSG0000(IER2     | TcellCD8 | Positive | 1.242 | 0.022 | 1.232 | 0.052 |
| ENSG0000(ARID5A   | TcellCD8 | Positive | 1.281 | 0.025 | 1.237 | 0.145 |
| ENSG0000(ITGAL    | TcellCD8 | Positive | 1.221 | 0.026 | 1.187 | 0.126 |
| ENSG0000(FRMD8    | TcellCD8 | Positive | 1.224 | 0.026 | 1.167 | 0.174 |
| ENSG0000(NPDC1    | TcellCD8 | Positive | 1.580 | 0.030 | 1.369 | 0.182 |
| ENSG0000(BOK      | TcellCD8 | Positive | 1.960 | 0.035 | 2.271 | 0.011 |
| ENSG0000(CD7      | TcellCD8 | Positive | 1.531 | 0.035 | 1.471 | 0.086 |
| ENSG0000(TBC1D13  | TcellCD8 | Positive | 1.211 | 0.036 | 1.130 | 0.279 |
| ENSG0000(ZFPM1    | TcellCD8 | Positive | 1.376 | 0.036 | 1.279 | 0.162 |
| ENSG0000(MTA2     | TcellCD8 | Positive | 1.157 | 0.037 | 1.149 | 0.152 |
| ENSG0000(ZFR2     | TcellCD8 | Positive | 2.384 | 0.039 | 1.635 | 0.245 |
| ENSG0000(GUK1     | TcellCD8 | Positive | 1.229 | 0.039 | 1.250 | 0.067 |
| ENSG0000(IL2RG    | TcellCD8 | Positive | 1.205 | 0.042 | 1.203 | 0.127 |
| ENSG0000(LZTS1    | TcellCD8 | Positive | 3.031 | 0.043 | 1.621 | 0.301 |
| ENSG0000(CDKN2D   | TcellCD8 | Positive | 1.316 | 0.043 | 1.239 | 0.180 |
| ENSG0000(SLC9A3R1 | TcellCD8 | Positive | 1.283 | 0.044 | 1.341 | 0.025 |
| ENSG0000(DMWD     | TcellCD8 | Positive | 1.323 | 0.045 | 1.239 | 0.224 |
| ENSG0000(DNM2     | TcellCD8 | Positive | 1.185 | 0.047 | 1.114 | 0.303 |
| ENSG0000(BAP1     | TcellCD8 | Positive | 1.170 | 0.049 | 1.131 | 0.218 |
| ENSG0000(PLEKHF1  | TcellCD8 | Positive | 1.333 | 0.161 | 1.663 | 0.014 |
| ENSG0000(IMP3     | TcellCD8 | Positive | 1.121 | 0.260 | 1.268 | 0.024 |
| ENSG0000(ASMTL    | TcellCD8 | Positive | 1.229 | 0.080 | 1.322 | 0.025 |
| ENSG0000(GNAO1    | TcellCD8 | Positive | 1.526 | 0.124 | 2.173 | 0.027 |
| ENSG0000(RNASEH2A | TcellCD8 | Positive | 1.191 | 0.151 | 1.325 | 0.029 |
| ENSG0000(MPP2     | TcellCD8 | Positive | 1.744 | 0.145 | 1.978 | 0.030 |
| ENSG0000(ACTL10   | TcellCD8 | Positive | 1.425 | 0.080 | 1.556 | 0.032 |
| ENSG0000(FFO2     | TcellCD8 | Positive | 1.188 | 0.141 | 1.305 | 0.033 |
| ENSG0000(NCR3     | TcellCD8 | Positive | 1.403 | 0.092 | 1.598 | 0.035 |
| ENSG0000(RNF187   | TcellCD8 | Positive | 1.182 | 0.154 | 1.318 | 0.035 |
| ENSG0000(SNTA1    | TcellCD8 | Positive | 1.256 | 0.179 | 1.552 | 0.037 |

| Bcell   | TcellCD4 | TcellCD8 | DendriticCε | Monocyte | NKcell   |
|---------|----------|----------|-------------|----------|----------|
| IL4R    | SNPH     | FCGBP    | GSN         | CD14     | CHST2    |
| IRF8    | PLCL1    | CD8A     | MDH1        | CD93     | FCGR3B   |
| CD79A   | ANK3     | LAG3     | CD9         | TNFRSF1B | CCL4     |
| POU2AF1 | FHIT     | GZMK     | IDH1        | S100A9   | APOBEC3G |
| CD79B   | EPHX2    | CRTAM    | CSTB        | CYBB     | ADAM8    |
| ADAM28  | ICOS     | CD8B     | TXNRD1      | VCAN     | IL2RB    |
| BLNK    | SCML1    | COL6A2   | GPX3        | FCN1     | IL18RAP  |
| MEF2C   | EDAR     | KLRG1    | CTSC        | S100A12  | GZMB     |
| TCL1A   | ANKRD55  | CD248    | LIPA        | LILRB2   | KLRD1    |
| P2RX5   | TLE2     | AGFG2    | ADAM9       | DUSP6    | ATP2B4   |
| SEL1L3  | NUF2     | RASGRF2  | CYP1B1      | LILRB3   | AUTS2    |
| TCF4    | NOG      | MAP9     | CEBPA       | SERPINA1 | PRF1     |
| HHEX    | EPPK1    | ACSL6    | ACP5        | MEGF9    | SLAMF7   |
| TSPAN13 | CTLA4    | ZNF792   | CD1C        | SULT1A2  | CLIC3    |
| BANK1   |          | JAKMIP1  | CD1B        | PLBD1    | KLRF1    |
| SCD5    |          |          | PRDX1       | C5AR1    | GNLY     |
| PAX5    |          |          | TXN         | KLF4     | FGFBP2   |
| HVCN1   |          |          | CD1E        | MS4A7    | FUT11    |
| MS4A1   |          |          | A2M         | MYADM    | C5orf56  |
| FCRL1   |          |          | GM2A        | MPEG1    | S1PR5    |

|                                                       | n  | Overall<br>N=51   | Controls<br>N=30  | Cases<br>N=21     | p-<br>value† |
|-------------------------------------------------------|----|-------------------|-------------------|-------------------|--------------|
| Site: Baltimore                                       | 51 | 19 (37%)          | 12 (41%)          | 7 (33%)           | 0.82         |
| Boston                                                |    | 11 (22%)          | 7 (23%)           | 4 (19%)           |              |
| New York                                              |    | 9 (18%)           | 4 (13%)           | 5 (24%)           |              |
| St. Louis                                             |    | 12 (23%)          | 7 (23%)           | 5 (24%)           |              |
| Mother's education: Less than high school             | 51 | 20 (39%)          | 15 (50%)          | 5 (24%)           | 0.18         |
| High school                                           |    | 21 (41%)          | 10 (33%)          | 11 (52%)          |              |
| More than high school                                 |    | 10 (20%)          | 5 (17%)           | 5 (24%)           |              |
| Birth season: January – March                         | 51 | 16 (31%)          | 9 (30%)           | 7 (33%)           | 0.81         |
| April – June                                          |    | 8 (16%)           | 6 (20%)           | 2 (10%)           |              |
| July – September                                      |    | 15 (29%)          | 8 (27%)           | 7 (33%)           |              |
| October – December                                    |    | 12 (24%)          | 7 (23%)           | 5 (24%)           |              |
| Annual income < \$15K                                 | 51 | 34 (67%)          | 19 (63%)          | 15 (71%)          | 0.76         |
| Mother is married                                     | 51 | 7 (14%)           | 3 (10%)           | 4 (19%)           | 0.43         |
| Child's race: Black                                   | 51 | 42 (82%)          | 24 (80%)          | 18 (86%)          | 0.87         |
| Hispanic                                              |    | 5 (10%)           | 3 (10%)           | 2 (9%)            |              |
| Mixed/other                                           |    | 4 (8%)            | 3 (10%)           | 1 (5%)            |              |
| Child's gestational age (wks.)                        | 51 | 38.6 ± 1.7        | 38.6 ± 1.6        | 38.6 ± 1.7        | 0.92         |
| Child's birth weight (g)                              | 51 | 3197 ± 434        | 3145 ± 421        | 3271 ± 450        | 0.32         |
| C-section delivery                                    | 51 | 15 (29%)          | 9 (30%)           | 6 (29%)           | 0.99         |
| Mother breastfed at 3 months                          | 48 | 9 (19%)           | 4 (14%)           | 5 (26%)           | 0.45         |
| Age of mother at time of birth                        | 51 | 23.1 ± 4.8        | 22.6 ± 4.8        | 23.8 ± 4.9        | 0.37         |
| Child's gender: male                                  | 51 | 36 (71%)          | 18 (60%)          | 18 (86%)          | 0.09         |
| Mother has had asthma                                 | 51 | 25 (49%)          | 13 (43%)          | 12 (57%)          | 0.49         |
| <b>Exposures in the first year of life</b>            |    |                   |                   |                   |              |
| Mother smoked                                         | 51 | 22 (43%)          | 15 (50%)          | 7 (33%)           | 0.37         |
| Number of smokers in the home                         | 51 | 1.2 ± 1.2         | 1.2 ± 1.4         | 1.1 ± 0.9         | 0.56         |
| Der f – bedroom (ug/g)                                | 49 | 0.28 [0.26; 0.35] | 0.28 [0.26; 0.34] | 0.28 [0.26; 0.45] | 0.93         |
| Der f – living room (ug/g)                            | 41 | 0.27 [0.26; 0.29] | 0.27 [0.26; 0.30] | 0.27 [0.26; 0.29] | 0.80         |
| Der p – bedroom (ug/g)                                | 49 | 0.46 [0.46; 0.46] | 0.46 [0.46; 0.46] | 0.46 [0.46; 0.46] | 0.33         |
| Der p – living room (ug/g)                            | 40 | 0.46 [0.46; 0.46] | 0.46 [0.46; 0.46] | 0.46 [0.46; 0.46] | 0.95         |
| Bla g – bedroom (U/g)                                 | 47 | 0.59 [0.20; 12.0] | 0.59 [0.20; 14.0] | 0.24 [0.20; 4.4]  | 0.28         |
| Bla g – living room (U/g)                             | 41 | 0.20 [0.20; 5.7]  | 0.20 [0.20; 1.2]  | 1.7 [0.20; 6.2]   | 0.17         |
| <b>Clinical characteristics in first year of life</b> |    |                   |                   |                   |              |
| Number of wheezing illnesses                          | 51 | 0.7 ± 1.1         | 0.3 ± 0.7         | 1.2 ± 1.4         | 0.01         |
| Any doctor visits for wheezing                        | 51 | 6 (12%)           | 1 (3%)            | 5 (24%)           | 0.07         |
| Any hospitalizations for wheezing                     | 51 | 0 (0%)            | 0 (0%)            | 0 (0%)            | n/a          |
| Any wheezing                                          | 51 | 17 (33%)          | 5 (17%)           | 12 (57%)          | 0.01         |
| Number of colds                                       | 51 | 4.4 ± 2.3         | 4.0 ± 2.3         | 4.9 ± 2.2         | 0.17         |
| EASI score                                            | 51 | 1.8 ± 3.3         | 0.4 ± 0.7         | 3.7 ± 4.5         | <0.01        |
| Runny nose‡                                           | 50 | 18 (36%)          | 9 (30%)           | 9 (45%)           | 0.43         |
| Stuffy nose‡                                          | 50 | 12 (24%)          | 6 (20%)           | 6 (30%)           | 0.51         |
| Frequent sneezing‡                                    | 50 | 12 (24%)          | 4 (13%)           | 8 (40%)           | 0.04         |

|                                          |    |                   |                   |                   |       |
|------------------------------------------|----|-------------------|-------------------|-------------------|-------|
| Itchy eyes‡                              | 50 | 10 (20%)          | 5 (17%)           | 5 (25%)           | 0.49  |
| <b>IgE levels at age 2 (kU/L)</b>        |    |                   |                   |                   |       |
| Total IgE                                | 51 | 28.7 [10.2; 201]  | 16.5 [6.2; 31.3]  | 258 [130; 596]    | <0.01 |
| Peanut IgE                               | 51 | 0.09 [0.09; 0.09] | 0.09 [0.09; 0.09] | 0.34 [0.09; 6.75] | <0.01 |
| Milk IgE                                 | 51 | 0.09 [0.09; 0.21] | 0.09 [0.09; 0.09] | 0.23 [0.09; 1.57] | <0.01 |
| Egg IgE                                  | 51 | 0.09 [0.09; 0.24] | 0.09 [0.09; 0.09] | 0.44 [0.16; 2.03] | <0.01 |
| German Cockroach IgE                     | 51 | 0.09 [0.09; 0.32] | 0.09 [0.09; 0.09] | 0.44 [0.09; 2.49] | <0.01 |
| Dermatophagoides pteronyssinus IgE       | 51 | 0.09 [0.09; 0.17] | 0.09 [0.09; 0.09] | 0.19 [0.12; 1.33] | <0.01 |
| Dermatophagoides farinae IgE             | 51 | 0.09 [0.09; 0.14] | 0.09 [0.09; 0.09] | 0.17 [0.09; 1.14] | <0.01 |
| Cat IgE                                  | 51 | 0.09 [0.09; 0.09] | 0.09 [0.09; 0.09] | 0.16 [0.09; 0.64] | <0.01 |
| Dog IgE                                  | 51 | 0.09 [0.09; 0.10] | 0.09 [0.09; 0.09] | 0.18 [0.09; 1.40] | <0.01 |
| Mouse IgE                                | 51 | 0.09 [0.09; 0.09] | 0.09 [0.09; 0.09] | 0.09 [0.09; 0.33] | <0.01 |
| Alternaria IgE                           | 51 | 0.09 [0.09; 0.09] | 0.09 [0.09; 0.09] | 0.09 [0.09; 0.17] | <0.01 |
| <b>IgE levels at age 7 (kU/L)</b>        |    |                   |                   |                   |       |
| Total IgE                                | 47 | 77.0 [33.5; 508]  | 37.0 [16.0; 65.5] | 564 [446; 1282]   | <0.01 |
| Peanut IgE                               | 47 | 0.10 [0.09; 0.64] | 0.09 [0.09; 0.10] | 0.81 [0.15; 25.1] | <0.01 |
| Milk IgE                                 | 47 | 0.12 [0.09; 0.23] | 0.09 [0.09; 0.12] | 0.26 [0.18; 1.12] | <0.01 |
| Egg IgE                                  | 47 | 0.10 [0.09; 0.26] | 0.09 [0.09; 0.10] | 0.29 [0.12; 0.91] | <0.01 |
| German Cockroach IgE                     | 47 | 0.10 [0.09; 2.59] | 0.09 [0.09; 0.10] | 5.44 [1.69; 41.9] | <0.01 |
| Dermatophagoides pteronyssinus IgE       | 47 | 0.10 [0.09; 2.47] | 0.09 [0.09; 0.10] | 3.41 [1.12; 8.36] | <0.01 |
| Dermatophagoides farinae IgE             | 47 | 0.10 [0.09; 3.05] | 0.09 [0.09; 0.10] | 4.62 [0.75; 30.1] | <0.01 |
| Cat IgE                                  | 46 | 0.10 [0.09; 0.92] | 0.09 [0.09; 0.10] | 4.00 [0.50; 20.2] | <0.01 |
| Dog IgE                                  | 47 | 0.10 [0.09; 2.72] | 0.09 [0.09; 0.10] | 4.57 [0.99; 19.0] | <0.01 |
| Mouse IgE                                | 47 | 0.09 [0.09; 0.45] | 0.09 [0.09; 0.10] | 3.06 [0.09; 10.4] | <0.01 |
| Alternaria IgE                           | 47 | 0.10 [0.09; 0.14] | 0.09 [0.09; 0.10] | 0.24 [0.10; 2.78] | <0.01 |
| <b>Clinical characteristics at age 7</b> |    |                   |                   |                   |       |
| Number of wheezing illnesses             | 51 | 0.9 ± 1.7         | 0.0 ± 0.0         | 2.2 ± 2.1         | <0.01 |
| Any doctor visits for wheezing           | 51 | 9 (18%)           | 0 (0%)            | 9 (43%)           | <0.01 |
| Any hospitalizations for wheezing        | 51 | 2 (4%)            | 0 (0%)            | 2 (10%)           | 0.16  |
| Any wheezing                             | 51 | 19 (37%)          | 0 (0%)            | 19 (91%)          | <0.01 |
| Number of colds                          | 51 | 2.0 ± 2.4         | 1.6 ± 1.9         | 2.5 ± 2.9         | 0.21  |
| EASI score                               | 46 | 0.3 ± 1.1         | 0.0 ± 0.0         | 0.8 ± 1.7         | 0.06  |
| Runny nose‡                              | 50 | 8 (16%)           | 5 (17%)           | 3 (15%)           | 0.99  |
| Stuffy nose‡                             | 50 | 12 (24%)          | 6 (20%)           | 6 (30%)           | 0.51  |
| Frequent sneezing‡                       | 50 | 13 (26%)          | 6 (20%)           | 7 (35%)           | 0.39  |
| Itchy eyes‡                              | 50 | 9 (18%)           | 3 (10%)           | 6 (30%)           | 0.13  |
| Any hay fever                            | 50 | 10 (20%)          | 3 (10%)           | 7 (35%)           | 0.07  |

\*Values are count (percentage), mean ± standard deviation, or median [IQR].

†P-values are from appropriate test for data – t-test for normally distributed, continuous data, Kruskal-Wallis test for non-normally distributed, continuous data, and either chi-squared or Fisher's exact tests for categorical data.

‡Questions indicate routine occurrence, or greater than 2 days per week over the past year.

|                                                       | n   | Neither<br>N=102  | Both= CR<br>Early+Late<br>N=20 | Asthma only<br>N=40 | Allergy only<br>N=35 | p-<br>value† |
|-------------------------------------------------------|-----|-------------------|--------------------------------|---------------------|----------------------|--------------|
| Site: Baltimore                                       | 197 | 36 (35%)          | 7 (35%)                        | 6 (15%)             | 12 (34%)             | 0.37         |
| Boston                                                |     | 24 (24%)          | 4 (20%)                        | 13 (33%)            | 8 (23%)              |              |
| New York                                              |     | 7 (7%)            | 4 (20%)                        | 5 (13%)             | 3 (9%)               |              |
| St. Louis                                             |     | 35 (34%)          | 5 (25%)                        | 16 (40%)            | 12 (34%)             |              |
| Mother's education: Less than high school             | 197 | 39 (38%)          | 4 (20%)                        | 20 (50%)            | 15 (43%)             | 0.49         |
| High school                                           |     | 41 (40%)          | 11 (55%)                       | 13 (33%)            | 13 (37%)             |              |
| More than high school                                 |     | 22 (22%)          | 5 (25%)                        | 7 (18%)             | 7 (20%)              |              |
| Birthseason: January – March                          | 197 | 20 (20%)          | 5 (25%)                        | 6 (15%)             | 7 (20%)              | 0.56         |
| April – June                                          |     | 24 (24%)          | 2 (10%)                        | 15 (38%)            | 8 (23%)              |              |
| July – September                                      |     | 28 (28%)          | 7 (35%)                        | 11 (28%)            | 13 (37%)             |              |
| October – December                                    |     | 30 (29%)          | 6 (30%)                        | 8 (20%)             | 7 (20%)              |              |
| Annual income < \$15K                                 | 197 | 63 (62%)          | 14 (70%)                       | 29 (73%)            | 30 (86%)             | 0.06         |
| Mother is married                                     | 197 | 15 (15%)          | 4 (20%)                        | 3 (8%)              | 1 (3%)               | 0.12         |
| Child's race: Black                                   | 197 | 78 (77%)          | 16 (80%)                       | 33 (83%)            | 29 (83%)             | 0.82         |
| Hispanic                                              |     | 15 (15%)          | 2 (10%)                        | 6 (15%)             | 3 (9%)               |              |
| Mixed/other                                           |     | 9 (9%)            | 2 (10%)                        | 1 (3%)              | 3 (9%)               |              |
| Child's gestational age (wks.)                        | 197 | 38.7 ± 1.5        | 38.5 ± 1.9                     | 38.8 ± 1.5          | 39.0 ± 1.5           | 0.67         |
| Child's birth weight (g)                              | 197 | 3226 ± 419        | 3314 ± 453                     | 3187 ± 512          | 3260 ± 540           | 0.77         |
| C-section delivery                                    | 197 | 27 (27%)          | 6 (30%)                        | 12 (30%)            | 9 (26%)              | 0.96         |
| Mother breastfed at 3 months                          | 185 | 21 (22%)          | 5 (26%)                        | 4 (11%)             | 10 (30%)             | 0.21         |
| Age of mother at time of birth                        | 197 | 24.7 ± 6.0        | 24.1 ± 5.1                     | 24.2 ± 6.2          | 24.2 ± 5.9           | 0.95         |
| Child's gender: male                                  | 197 | 49 (48%)          | 16 (80%)                       | 24 (60%)            | 21 (60%)             | 0.05         |
| Mother has had asthma                                 | 196 | 29 (28%)          | 10 (50%)                       | 24 (62%)            | 16 (46%)             | <0.01        |
| <b>Exposures in the first year of life</b>            |     |                   |                                |                     |                      |              |
| Mother smoked                                         | 197 | 48 (47%)          | 6 (30%)                        | 17 (43%)            | 11 (31%)             | 0.28         |
| Number of smokers in the home                         | 197 | 1.4 ± 1.3         | 1.2 ± 0.9                      | 1.4 ± 1.3           | 1.1 ± 0.9            | 0.53         |
| Der f – bedroom (ug/g)                                | 196 | 0.27 [0.26; 0.33] | 0.27 [0.26; 0.31]              | 0.27 [0.26; 0.28]   | 0.28 [0.27; 0.46]    | 0.05         |
| Der f – living room (ug/g)                            | 195 | 0.27 [0.26; 0.31] | 0.27 [0.26; 0.29]              | 0.27 [0.26; 0.29]   | 0.28 [0.26; 0.36]    | 0.27         |
| Der p – bedroom (ug/g)                                | 195 | 0.46 [0.46; 0.46] | 0.46 [0.46; 0.46]              | 0.46 [0.46; 0.46]   | 0.46 [0.46; 0.46]    | 0.46         |
| Der p – living room (ug/g)                            | 194 | 0.46 [0.46; 0.46] | 0.46 [0.46; 0.46]              | 0.46 [0.46; 0.46]   | 0.46 [0.46; 0.46]    | 0.59         |
| Bla g – bedroom (U/g)                                 | 197 | 0.20 [0.20; 4.38] | 0.85 [0.20; 5.78]              | 0.20 [0.20; 3.32]   | 3.60 [0.20; 17.0]    | 0.02         |
| Bla g – living room (U/g)                             | 197 | 0.20 [0.20; 3.13] | 1.53 [0.20; 5.88]              | 0.98 [0.20; 7.35]   | 3.10 [0.20; 13.50]   | 0.04         |
| <b>Clinical characteristics in first year of life</b> |     |                   |                                |                     |                      |              |
| Number of wheezing illnesses                          | 197 | 0.8 ± 1.9         | 1.2 ± 1.4                      | 2.1 ± 2.4           | 1.5 ± 2.7            | 0.01         |
| Any doctor visits for wheezing                        | 197 | 6 (6%)            | 3 (15%)                        | 13 (33%)            | 3 (9%)               | <0.01        |
| Any hospitalizations for wheezing                     | 197 | 0 (0%)            | 0 (0%)                         | 0 (0%)              | 0 (0%)               | n/a          |
| Any wheezing                                          | 197 | 37 (36%)          | 12 (60%)                       | 29 (73%)            | 16 (46%)             | <0.01        |



|                                                       |     |           |           |           |           |       |
|-------------------------------------------------------|-----|-----------|-----------|-----------|-----------|-------|
| Number of colds                                       | 197 | 4.2 ± 2.9 | 5.3 ± 2.1 | 5.4 ± 2.6 | 4.3 ± 3.1 | 0.10  |
| EASI score                                            | 197 | 0.7 ± 1.6 | 3.6 ± 4.5 | 1.0 ± 1.9 | 1.6 ± 3.2 | <0.01 |
| Sensitivity to food(s) – milk/egg/peanut              | 158 | 18 (21%)  | 8 (53%)   | 11 (34%)  | 11 (41%)  | 0.03  |
| <b>Clinical characteristics in third year of life</b> |     |           |           |           |           |       |
| Number of wheezing illnesses                          | 197 | 0.4 ± 1.0 | 1.6 ± 2.4 | 2.3 ± 2.1 | 0.7 ± 1.4 | <0.01 |
| Any doctor visits for wheezing                        | 197 | 5 (5%)    | 8 (40%)   | 11 (28%)  | 2 (6%)    | <0.01 |
| Any hospitalizations for wheezing                     | 197 | 0 (0%)    | 1 (5%)    | 1 (3%)    | 0 (0%)    | 0.16  |
| Any wheezing                                          | 197 | 25 (25%)  | 11 (55%)  | 32 (80%)  | 11 (31%)  | <0.01 |
| Number of colds                                       | 197 | 3.5 ± 3.0 | 4.0 ± 2.9 | 4.9 ± 3.1 | 3.2 ± 2.8 | 0.06  |
| EASI score                                            | 180 | 0.6 ± 2.0 | 1.4 ± 2.0 | 0.3 ± 0.9 | 1.5 ± 6.9 | 0.40  |
| Sensitivity to food(s) – milk/egg/peanut              | 175 | 26 (28%)  | 7 (44%)   | 17 (50%)  | 14 (42%)  | 0.10  |

\*Values are count (percentage), mean ± standard deviation, or median [IQR].

†P-values are from appropriate test for data – t-test for normally distributed, continuous data, Kruskal-Wallis test for non-normally distributed, continuous data, and either chi-squared or Fisher's exact tests for categorical data.
